# Supplementary material
Source: PubMed Central journal article supplement (PMC4028077)
Supplement: NIHMS513877-supplement-1.pdf [file NIHMS513877-supplement-1.pdf]

# **Menin Directly Represses expression of Gli1 Independent of the Canonical Hedgehog Signaling Pathway**

Buddha Gurung<sup>1</sup>, Zijie Feng<sup>2</sup>, Xianxin Hua<sup>1</sup>

Supplementary Figures and Tables

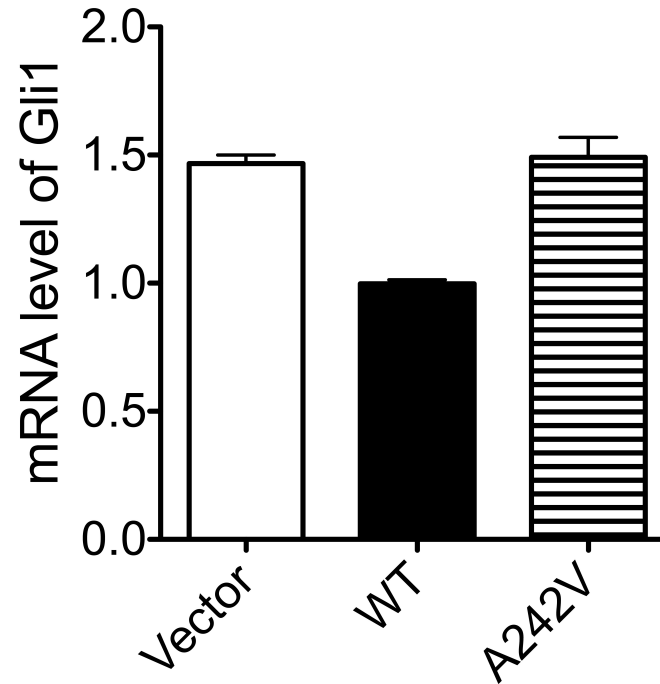

**Supplementary Figure S1.** *Gli1* mRNA levels in menin-null cells complemented with physiologically relevant *Men1* mutants. *Men1*-null MEF's were complemented with either vector, WT, or the mutant A242V and the levels of *Gli1* were determined by qRT-PCR. Data was normalized to *Men1*-null cells complemented with WT menin.

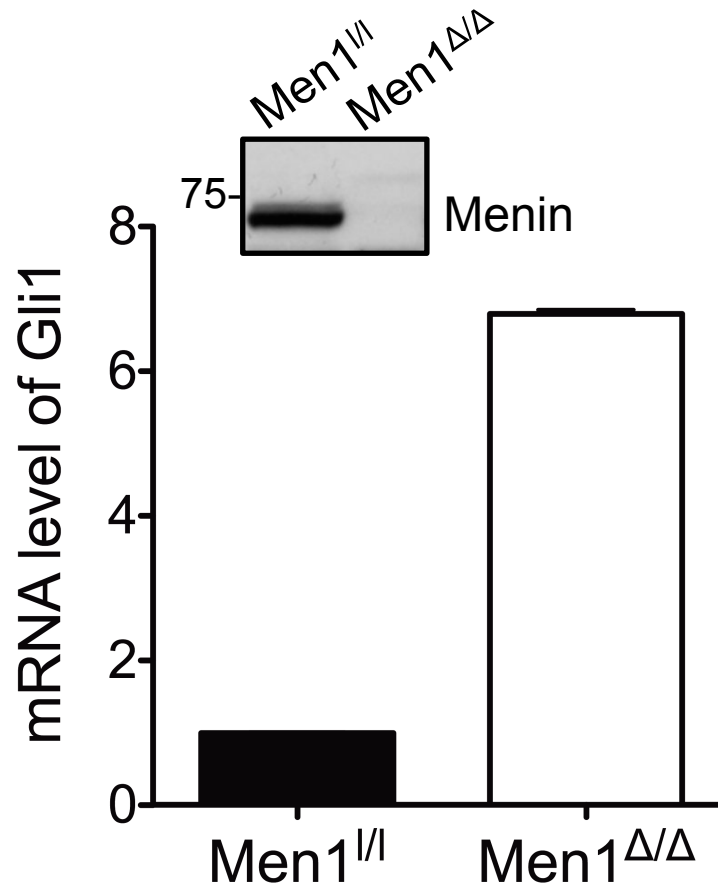

**Supplementary Figure S2.** *Gli1* mRNA levels are elevated upon *Men1* excision in MEFs. *Men1*<sup>+/+</sup>; *Ubc9* CreER cells were treated with either DMSO or 4-hydroxy tamoxifen (4-OHT) and the levels of *Gli1* were determined by qRT-PCR. Inset, Western Blotting showing complete excision of menin upon 4-OHT treatment. Data were normalized to *Gli1* values in DMSO-treated cells.

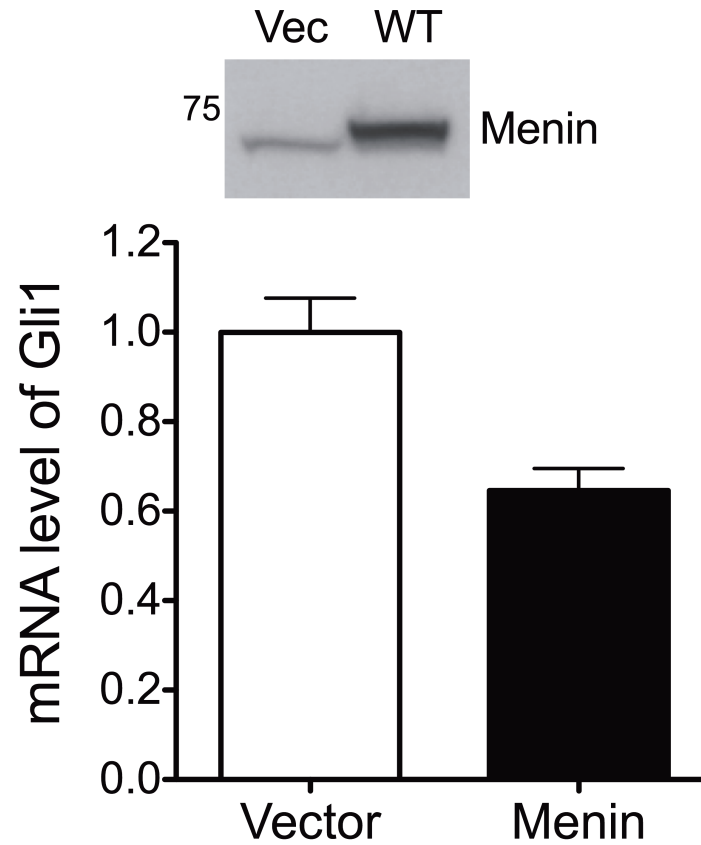

**Supplementary Figure S3.** Ectopic expression of menin results in reduction of *Gli1* in BON cells, a human carcinoid cell line. qRT-PCR for *Gli1* mRNA in BON cells ectopically expressing menin or control vector. Inset, Western blotting of menin in BON cells ectopically expressing menin or control vector.

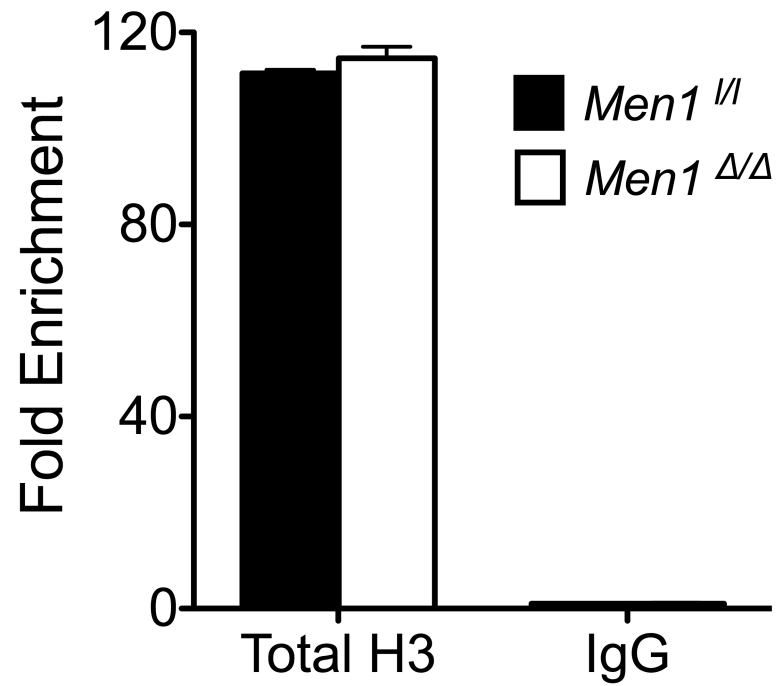

**Supplementary Figure S4.** Chromatin IP (ChIP) for total histone H3 in PIME1 cells treated with either DMSO (*Men1*<sup>l/l</sup>) or tamoxifen (*Men1*<sup>Δ/Δ</sup>).

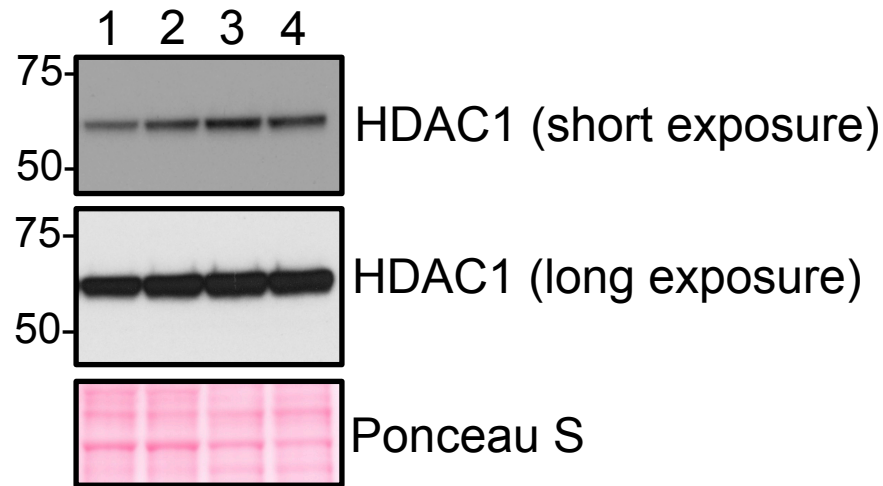

**Supplementary Figure S5.** Total HDAC1 level are unaffected upon *Men1* excision. Cell lysates from *Men1<sup>fl/fl</sup>;CreER* MEFs treated with either DMSO (lane 1) or tamoxifen (lane 2), and PIME cells treated with either DMSO (lane 3) or tamoxifen (lane 4) were subjected to SDS-PAGE and immunoblotted for HDAC1. Ponceau S is included as a loading control.

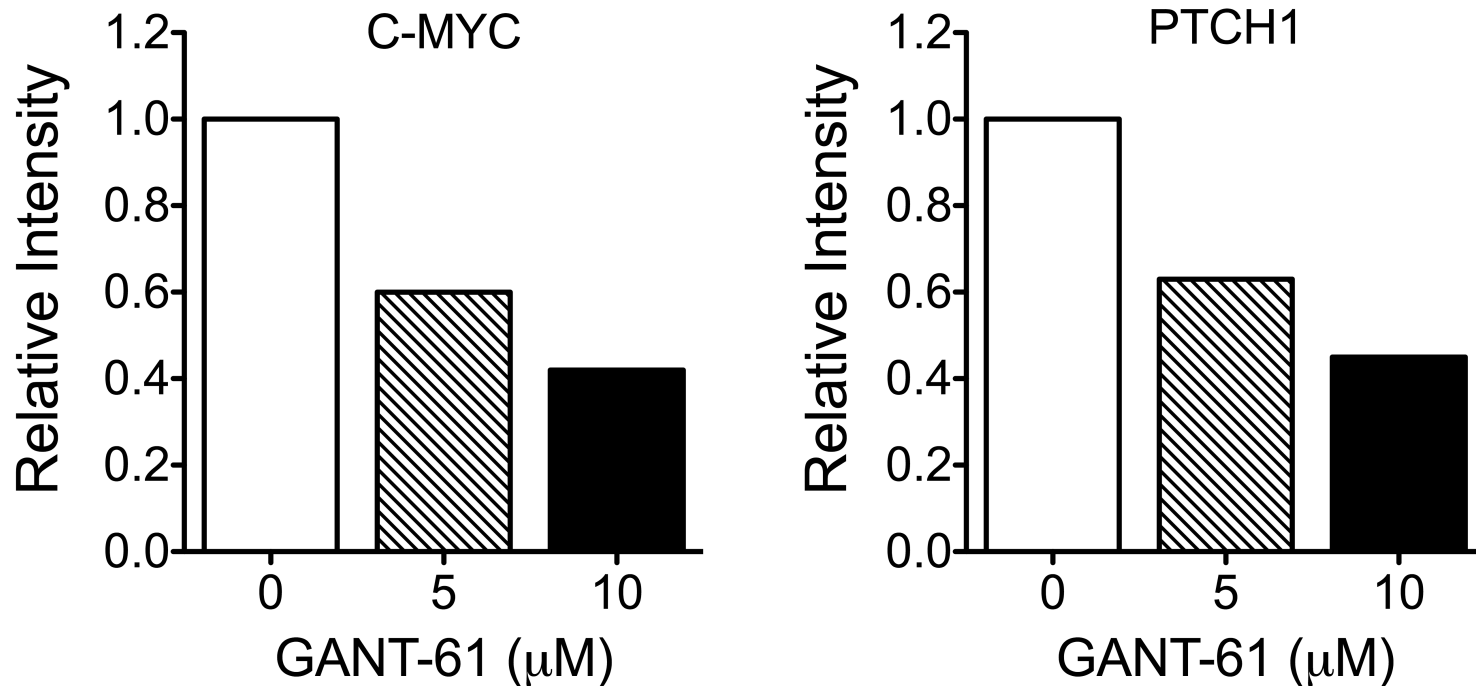

**Supplementary Figure S6.** Quantitation of C-MYC and PTCH1 protein levels in menin-null PIME1 cells treated with GANT-61. Cell lysates from menin-null PIME1 cells treated with either DMSO or GANT-61 were immunoblotted with anti-MYC and anti-PTCH1 antibodies, and the band intensities were quantitated by densitometric analysis using Image J software and normalized to the intensity of their respective Ponceau S stains. Data are normalized to DMSO-treated cells.

Table I: qRT-PCR primers

|              |                       |
|--------------|-----------------------|
| Gli1-Forward | GATGAAGGACCTTGTGTCTCG |
| Gli1-Reverse | GGCTGACTGTGTAAGCAGAGC |

Table II: ChIP primers

|                                          |                       |
|------------------------------------------|-----------------------|
| Gli1 (-1203 bp / -925 bp) <i>Forward</i> | GAAGACTCTCTCTCCCCACC  |
| Gli1 (-1203 bp / -925 bp) <i>Reverse</i> | CCTCGGAGTGGA AATGATTG |
